# Supplementary material for: Chaenomelin, a New Phenolic Glycoside, and Anti-Helicobacter pylori Phenolic Compounds from the Leaves of Salix chaenomeloides
Source: MDPI journal article supplement (doi:10.3390/plants13050701), 2024-02-29
Supplement: s1 [file s1]

## Supplementary Materials

---

# Chaenomelin, a New Phenolic Glycoside and Anti-*Helicobacter pylori* Phenolic Compounds from the Leaves of *Salix chaenomeloides*

Kyung Ah Kim <sup>1</sup>, Dong-Min Kang <sup>2</sup>, Yoon-Joo Ko <sup>3</sup>, Moon-Jin Ra <sup>4</sup>, Sang-Mi Jung <sup>4</sup>, Jeong-Nam Yu <sup>5</sup>, Mi-Jeong Ahn <sup>2</sup> and Ki Hyun Kim <sup>1,\*</sup>

---

<sup>1.</sup> School of Pharmacy, Sungkyunkwan University, Suwon 16419, Republic of Korea.

<sup>2.</sup> College of Pharmacy and Research Institute of Pharmaceutical Sciences, Gyeongsang National University, Jinju 52828, Republic of Korea.

<sup>3.</sup> Laboratory of Nuclear Magnetic Resonance, National Center for Inter-University Research Facilities (NCIRF), Seoul National University, Gwanak-gu, Seoul 08826, Republic of Korea

<sup>4.</sup> Hongcheon Institute of Medicinal Herb, Hongcheon-gun 25142, Republic of Korea

<sup>5.</sup> Nakdonggang National Institute of Biological Resources, Sangju 37242, Republic of Korea

\* Correspondence: E-mail: khkim83@skku.edu; Tel: +82-31-290-7700; Fax: +82-31-290-7730

**Electronic Supplementary Information Contents:**

|                                                                                                               |    |
|---------------------------------------------------------------------------------------------------------------|----|
| <b>Figure S1.</b> The HR-ESIMS data of compound <b>1</b> .....                                                | S3 |
| <b>Figure S2.</b> The UV spectrum of compound <b>1</b> .....                                                  | S4 |
| <b>Figure S3.</b> The $^1\text{H}$ NMR spectrum of compound <b>1</b> ( $\text{CD}_3\text{OD}$ , 850 MHz)..... | S5 |
| <b>Figure S4.</b> The $^1\text{H}$ - $^1\text{H}$ COSY spectrum of compound <b>1</b> .....                    | S6 |
| <b>Figure S5.</b> The HSQC spectrum of compound <b>1</b> .....                                                | S7 |
| <b>Figure S6.</b> The HMBC spectrum of compound <b>1</b> .....                                                | S8 |

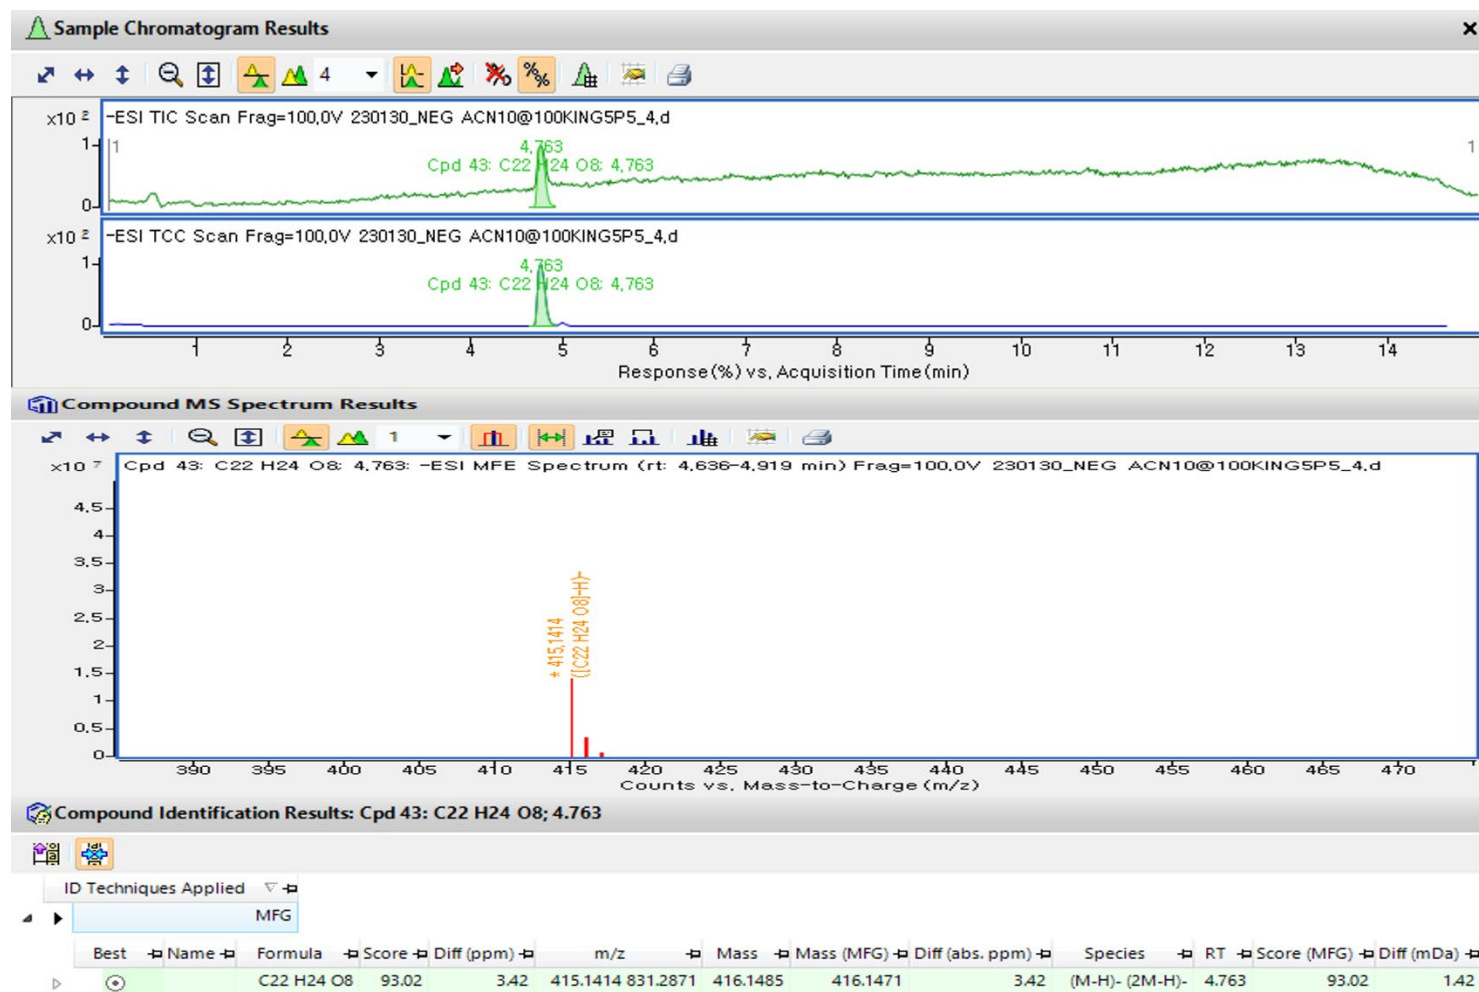

Figure S1. The HR-ESIMS data of compound 1.

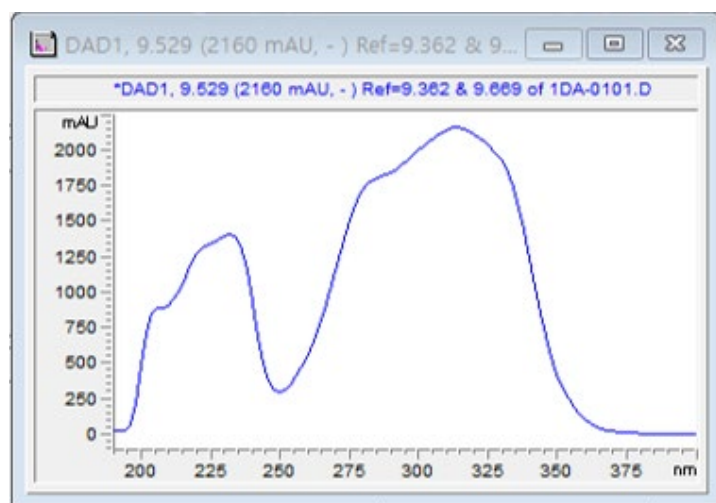

**Figure S2.** The UV spectrum of compound **1**.

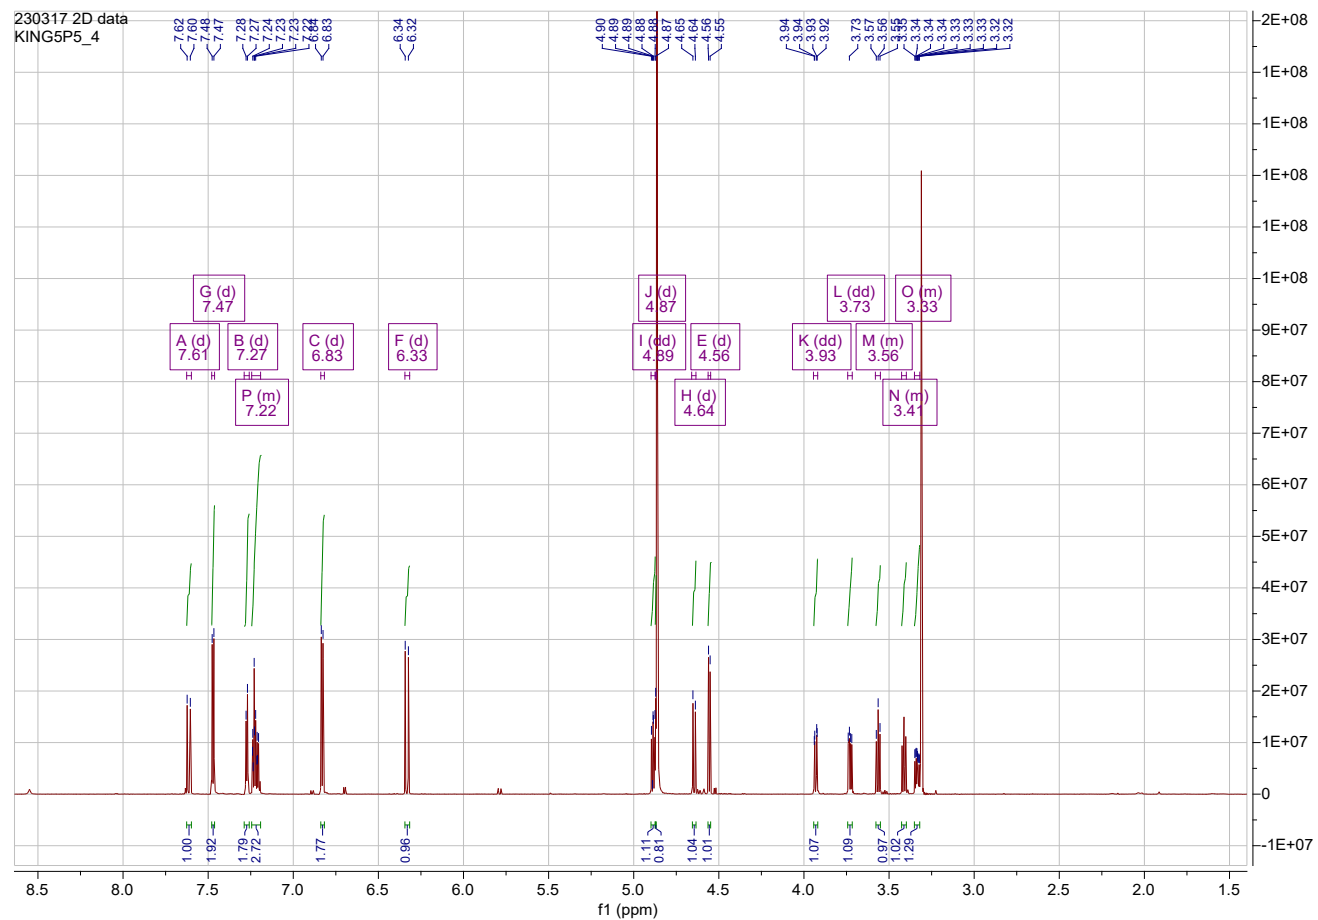

**Figure S3.** The  $^1\text{H}$  NMR spectrum of compound **1** ( $\text{CD}_3\text{OD}$ , 850 MHz).



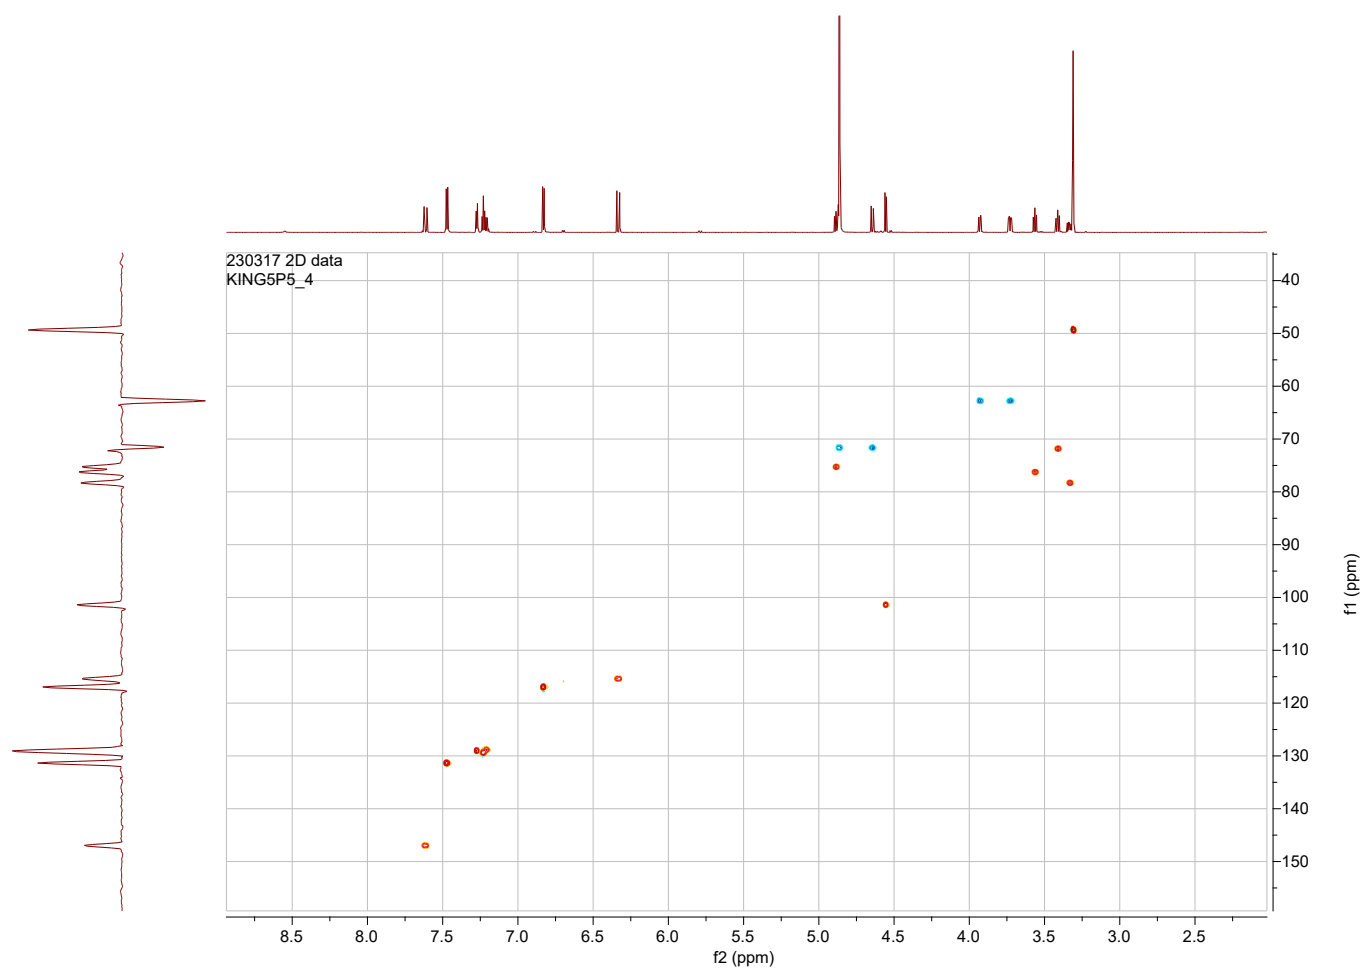

**Figure S5.** The HSQC spectrum of compound **1**.

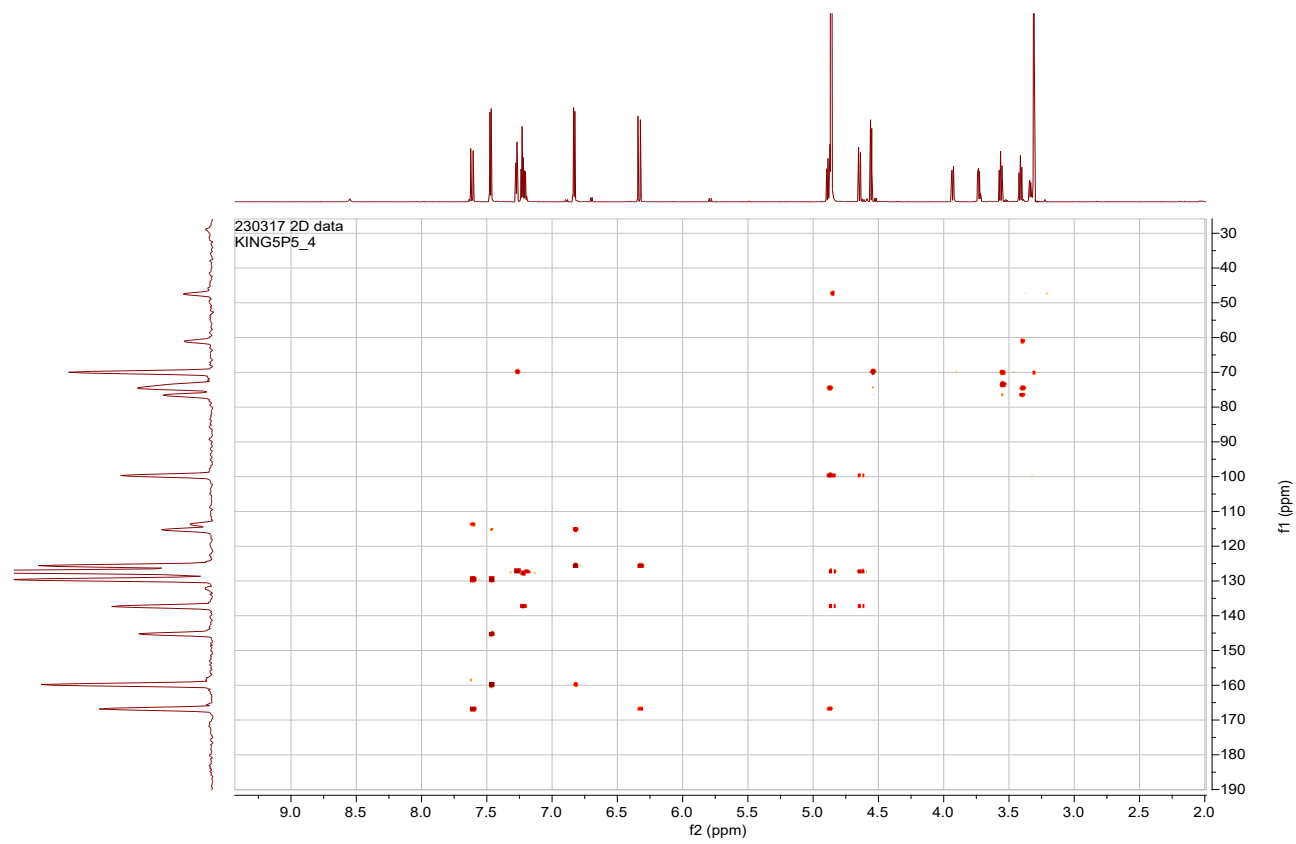

**Figure S6.** The HMBC spectrum of compound **1**.
